# Supplementary material for: Energy-efficient and eco-friendly continuous production of 5-CMF in a UV-ultrasound irradiated catalytic packed bed reactor: heterogeneous kinetics, reactor simulation and LCA analysis
Source: Royal Society of Chemistry journal article supplement (doi:10.1039/d3re00406f), 2023-09-29
Supplement: d3re00406f1.pdf [file d3re00406f1.pdf]

# Energy-efficient and eco-friendly continuous production of 5-CMF in a UV-Ultrasonication irradiated catalytic packed bed reactor: heterogeneous kinetics, reactor simulation and LCA analysis

Sourav Barman<sup>a</sup> and Rajat Chakraborty<sup>a\*</sup>

<sup>a</sup>Chemical Engineering Department, Jadavpur University, Kolkata-700032, India

\*Corresponding Author, Tel: +91 3324572689; fax: +91 3324146378

Email: [rajat\\_chakraborty25@yahoo.com](mailto:rajat_chakraborty25@yahoo.com); [rajat.chakraborty@jadavpuruniversity.in](mailto:rajat.chakraborty@jadavpuruniversity.in)

## S1. Conversion analysis:

Soluble starch (SS) conversion, glucose yield, 5-HMF yield and 5-CMF yield were calculated according to the below equations

$$SS \text{ conversion} = \left[ \frac{\text{Initial SS (g)} - \text{Final SS (g)}}{\text{Initial SS (g)}} \right] \times 100 \quad (1)$$

$$Glucose \text{ yield } (Y_G) = \left[ \frac{\text{Glucose produced (g)}}{\text{Initial SS (g)} \times 1.111} \right] \times 100 \quad (2)$$

$$5 - HMF \text{ yield } (Y_{HMF}) = \left[ \frac{5 - HMF \text{ produced (g)}}{\text{Initial SS (g)} \times 0.7778} \right] \times 100 \quad (3)$$

$$5 - CMF \text{ yield } (Y_{CMF}) = \left[ \frac{5 - CMF \text{ produced (g)}}{\text{Initial SS (g)} \times 0.8915} \right] \times 100 \quad (4)$$

The denominating factor 1.111, 0.7778 and 0.8915 accounts for the mass accumulation or mass reduction during conversion of repeating units of starch to glucose, 5-HMF and 5-CMF respectively<sup>1</sup>.

**Table S1.** L-9 Taguchi orthogonal design for 5-CMF synthesis

| $\Phi_T$ | $\Phi_t$ | $\Phi_{S101/TiO_2}$ | $\Phi_{ChCl/SS}$ | $Y_{CMF}$ | S.D.       |
|----------|----------|---------------------|------------------|-----------|------------|
| 60       | 30       | 0.5                 | 1                | 18.10     | $\pm 0.50$ |
| 60       | 60       | 1.5                 | 3                | 30.23     | $\pm 0.80$ |
| 60       | 90       | 2.5                 | 5                | 39.00     | $\pm 1.00$ |
| 70       | 30       | 1.5                 | 5                | 45.4      | $\pm 0.30$ |
| 70       | 60       | 2.5                 | 1                | 33.10     | $\pm 0.50$ |
| 70       | 90       | 0.5                 | 3                | 35.00     | $\pm 0.50$ |
| 80       | 30       | 2.5                 | 3                | 37.82     | $\pm 0.25$ |
| 80       | 60       | 0.5                 | 5                | 58.27     | $\pm 0.50$ |
| 80       | 90       | 1.5                 | 1                | 41.10     | $\pm 0.20$ |

## S2. Analyses of the external mass transfer resistance between reactants and solid catalysts

Mear's criterion ( $\Omega$ ) (Equation-5) was employed to analyse the external diffusion-controlled regimes<sup>2</sup>. According to Mear's criterion,  $\Omega < 0.15$ , implied negligible external mass transfer diffusion resistance; whereas,  $\Omega > 0.15$ , inferred that the reaction was external mass transfer resistance limited.

$$\Omega = \frac{nr \rho_c R_c}{K_m C} < 0.15 \dots \dots \dots (5)$$

Where n: reaction's order;  $R_c$  (m): radius of the catalyst (S-101 or TiO<sub>2</sub>) [In the calculation of  $\Omega$  for the SS hydrolysis, glucose dehydration, and 5-HMF chlorination steps, only the catalyst radius relevant to each specific reaction step was taken into consideration];  $r$  (Kmol /kg cat. s): maximum observed reaction rate for SS hydrolysis, glucose dehydration, and 5-HMF chlorination steps.  $K_m$  (m/s): mass transfer coefficient;  $\rho_c$  (kg / m<sup>3</sup>): catalyst bulk density;  $C$  (Kmol / m<sup>3</sup>): bulk concentration of limiting reactant (SS, glucose, 5-HMF).  $K_m$  was calculated using the following Equation-6<sup>3</sup>.

$$\frac{2R_c K_m}{D} = 2.0 + 0.6 \left( \frac{2R_c V}{\vartheta} \right)^{\frac{1}{2}} \left( \frac{\vartheta}{D} \right)^{\frac{1}{3}} \dots \dots \dots (6)$$

Where  $D$  (m<sup>2</sup>/s): diffusion coefficient of reactants viz., SS, glucose and 5-HMF through reaction medium;  $\vartheta$  (m<sup>2</sup>/s): kinematic viscosity of reaction mixture;  $V$  (m/s): velocity of reactants approaching catalyst. The velocity ( $V$ ) of reactants under ultrasound has been calculated according to Frenkel et al.<sup>4</sup>.

$$V = \frac{(0.0992 \times I_{US})}{100} \dots\dots\dots(7)$$

Where,  $I_{US}$  is the intensity of ultrasound in W/cm<sup>2</sup>.

The  $D$  of reactants was evaluated using Wilke-Chang equation as per Equation-8.

$$D = 1.173 \times 10^{-16} (\theta M_W)^{\frac{1}{2}} \frac{T}{\mu_{mix} (V_m)^{0.6}} \dots\dots\dots(8)$$

Where  $\theta$ : the association parameter (2.26 for water)<sup>5</sup>;  $M_W$  (kg/mol): molecular weight of water;  $\mu_{mix}$  (kg/m s): bulk viscosity of reaction mixture;  $V_m$  (m<sup>3</sup>/kg mol): molar volume of reactants at the boiling point. The bulk viscosity and kinematic viscosity of the individual components as well as molar volume of the reactants were calculated from ASPEN PLUS software. The  $\mu_{mix}$  were calculated according to equation-9.

$$\mu_{mix} = \sum_1^n x_i \mu_i \dots\dots\dots(9)$$

Here  $n$  is the total number of components,  $x_i$  represents the mole fraction of  $i$ -th component and  $\mu_i$  represent the bulk viscosity of the  $i$ -th component.

### S3. Synthesis of TiO<sub>2</sub> coated glass beads

To prepare the TiO<sub>2</sub> coated glass beads, the surface of the glass beads was initially roughened through a chemical etching process by immersing the glass beads in hydrofluoric acid for a duration of 24 hours. Subsequently, the nano TiO<sub>2</sub> powder and HF-treated glass beads were mixed in an acetone medium at a temperature of 70°C. The mixing process was conducted under magnetic stirring conditions at 300 rpm for a period of 3 hours. Following this, the mixture was subjected to oven drying and finally calcined at a temperature of 300°C for a duration of 3 hours to produce TiO<sub>2</sub> coated glass beads (Fig. S1) with average beads size of 4 mm and average coating thickness of 0.2 mm. According to the BET analysis, the TiO<sub>2</sub> coating applied to the glass beads was found to be non-porous, exhibiting an extremely low amount of average pore volume (0.021 cm<sup>3</sup>/g) and an average pore diameter (1.27 nm) that was negligible. The TiO<sub>2</sub> loading weight was determined by measuring the difference between the weight of the glass beads before and after the TiO<sub>2</sub> coating process.

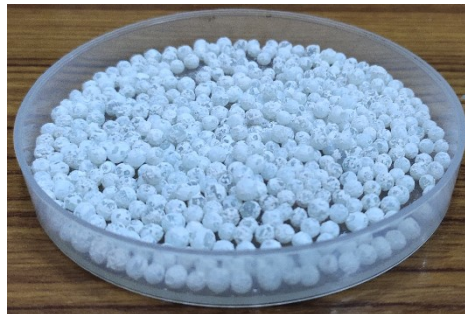

**Fig. S1.** TiO<sub>2</sub> coated glass beads

### S4. RTD analysis for UVUS-RPBR

In pulse tracer experiment, water was used as eluent with the flow rate of 126 ml/h and blue Dextran was used as tracer material which was injected in one shot for the evaluation of the residence time distribution (RTD) parameters of the RPBR with bed porosity of 0.56. The tracer concentrations at outlet stream were measured using a UV-VIS detector at 300 nm and exit-age distribution function (E(t)) with respect to time was evaluated. The Peclet number ( $Pe$ ) was calculated considering 'closed-closed' Danckwerts boundary conditions as per Equation-10.

$$\frac{\sigma^2}{\tau_{mean}^2} = \frac{2}{Pe} - \frac{2}{Pe^2} (1 - e^{-Pe}) \dots\dots\dots(10)$$

Where  $Pe = \frac{UL}{D}$

Here,  $L$  is the reactor length,  $U$  is the superficial velocity of water,  $D$  is the dispersion number.

**Table S2.** LCI data for production of 1 kg of TiO<sub>2</sub> coated glass beads

| Category           | Flow                                | Value          | Unit         | Source        | Comments                                                                                                |
|--------------------|-------------------------------------|----------------|--------------|---------------|---------------------------------------------------------------------------------------------------------|
| Energy Input       | Electricity consumed                | 3.3            | kWh          | Ecoinvent-3.5 |                                                                                                         |
| Material Input     | Hydrofluoric acid                   | 0.5            | Kg           | Ecoinvent-3.5 |                                                                                                         |
|                    | TiO <sub>2</sub>                    | 0.1            | Kg           | Ecoinvent-3.5 |                                                                                                         |
|                    | Glass beads                         | 1.0            | Kg           | Ecoinvent-3.5 |                                                                                                         |
| Transports         | Hydrofluoric acid                   | 0.0031         | Kg.km        | Ecoinvent-3.5 | Transport by lorry, capacity: 16 metric ton, EURO VI (assuming all materials came from 100 km distance) |
|                    | TiO <sub>2</sub>                    | 0.000625       | Kg.km        | Ecoinvent-3.5 |                                                                                                         |
|                    | Glass beads                         | 0.005625       | Kg.km        | Ecoinvent-3.5 |                                                                                                         |
|                    | <b>Total</b>                        | <b>0.00935</b> | <b>Kg.km</b> | Ecoinvent-3.5 |                                                                                                         |
| Emissions to air   | Waste heat                          | 11.8           | MJ           | Ecoinvent-3.5 | Assuming electrical energy used was dissipated as heat to air (1 kWh =3.6 MJ)                           |
| Waste of materials | Sludge                              | 0.6            | kg           | Ecoinvent-3.5 | Generated during hydrofluoric acid treatment                                                            |
| Output             | TiO <sub>2</sub> coated glass beads | 1              | Kg           | Created       |                                                                                                         |

**Table S3.** LCI data for production of 1 kg of CMF production in UVUS-RPBR

| Category         | Flow                                | Value         | Unit         | Source        | Comments                                                                                                |
|------------------|-------------------------------------|---------------|--------------|---------------|---------------------------------------------------------------------------------------------------------|
| Energy Input     | Electricity consumed                | 0.365         | kWh          | Ecoinvent-3.5 |                                                                                                         |
| Material Input   | Starch                              | 1.91          | Kg           | Ecoinvent-3.5 | As remaining choline chloride, water recycled back.                                                     |
|                  | Choline chloride                    | 0.965         | Kg           | Ecoinvent-3.5 |                                                                                                         |
|                  | Water                               | 0.0346        | Kg           | Ecoinvent-3.5 | All cyclohexane was recycled, except for a 5 % volume loss during recycling.                            |
|                  | Cyclohexane                         | 0             | Kg           | Ecoinvent-3.5 |                                                                                                         |
|                  | Smopex-101                          | 0.0192        | Kg           | Created       |                                                                                                         |
|                  | TiO <sub>2</sub> coated glass beads | 0.127         | Kg           | From Table 2S | Catalysts recycling up to 6 times.                                                                      |
|                  | Ethanol                             | 0.10          | kg           | Ecoinvent-3.5 | For choline chloride separation.                                                                        |
| Transports       | Starch                              | 0.012         | Kg.km        | Ecoinvent-3.5 | Transport by lorry, capacity: 16 metric ton, EURO VI (assuming all materials came from 100 km distance) |
|                  | Choline chloride                    | 0.006         | Kg.km        | Ecoinvent-3.5 |                                                                                                         |
|                  | Water                               | 0.00022       | Kg.km        | Ecoinvent-3.5 |                                                                                                         |
|                  | Cyclohexane                         | 0.012         | Kg.km        | Ecoinvent-3.5 |                                                                                                         |
|                  | Smopex-101                          | 0.00012       | Kg.km        | Ecoinvent-3.5 |                                                                                                         |
|                  | TiO <sub>2</sub> coated glass beads | 0.0008        | Kg.km        | Ecoinvent-3.5 |                                                                                                         |
|                  | Ethanol                             | 0.000625      | Kg.km        | Ecoinvent-3.5 |                                                                                                         |
|                  | <b>Total</b>                        | <b>0.0318</b> | <b>Kg.km</b> | Ecoinvent-3.5 |                                                                                                         |
| Emissions to air | Waste heat                          | 1.314         | MJ           | Ecoinvent-3.5 | Assuming electrical energy used was dissipated as heat to air (1 kWh =3.6 MJ)                           |
|                  | Water vapour                        | 0.084         | kg           |               |                                                                                                         |
| Output           | 5-CMF                               | 1             | Kg           | Created       |                                                                                                         |
|                  | Glucose                             | 0.345         | Kg           | Ecoinvent-3.5 |                                                                                                         |
|                  | 5-HMF                               | 0.202         | Kg           | Created       |                                                                                                         |

**Table S4.** Purification of 1 kg of 5-CMF

| Category       | Flow                 | Value | Unit | Source        | Comments |
|----------------|----------------------|-------|------|---------------|----------|
| Energy Input   | Electricity consumed | 0.125 | kWh  | Ecoinvent-3.5 |          |
| Material Input | 5-CMF                | 1     | kg   | From Table 3S |          |

|                  |                           |              |          |               |                                                                                                                                 |
|------------------|---------------------------|--------------|----------|---------------|---------------------------------------------------------------------------------------------------------------------------------|
| Emissions to air | Waste heat<br>Cyclohexane | 0.45<br>0.95 | MJ<br>Kg | Ecoinvent-3.5 | Assuming electrical energy used was dissipated as heat to air (1 kWh =3.6 MJ)<br>(5 % of volume loss of total used cyclohexane) |
| Output           | Purified 5-CMF            | 1            | Kg       | Created       |                                                                                                                                 |

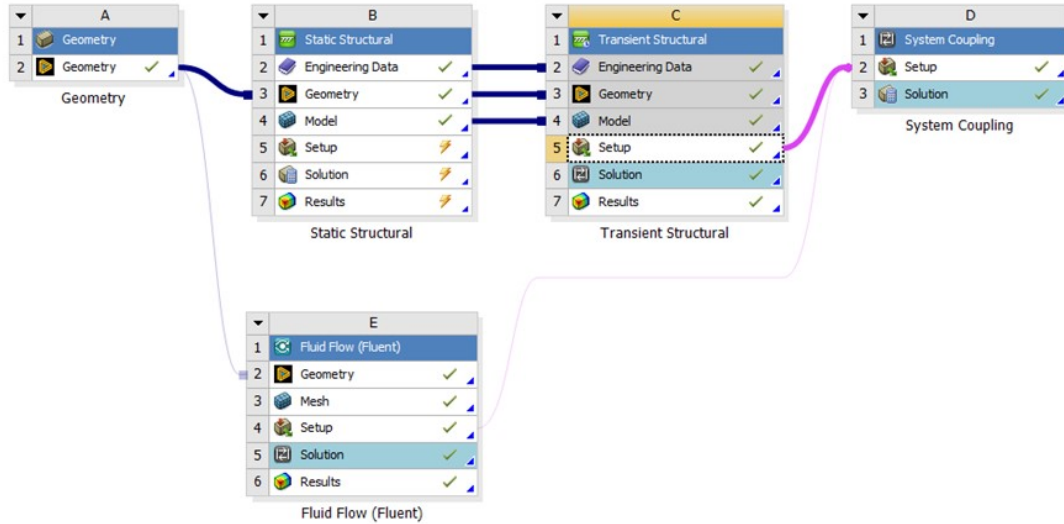

Fig. S2. ANSYS Transient Structural and ANSYS Fluent coupling for the simulation of UVUS-RPBR

|    | A                                                 | B                   | C    | D                                   | E                        |
|----|---------------------------------------------------|---------------------|------|-------------------------------------|--------------------------|
| 1  | Property                                          | Value               | Unit |                                     |                          |
| 2  | Material Field Variables                          | Table               |      |                                     |                          |
| 3  | Density                                           | 4500                | k... |                                     |                          |
| 4  | Isotropic Secant Coefficient of Thermal Expansion |                     |      |                                     |                          |
| 6  | Isotropic Elasticity                              |                     |      | <input checked="" type="checkbox"/> |                          |
| 7  | Derive from                                       | Young's Modulus ... |      |                                     |                          |
| 8  | Young's Modulus                                   | 2E+11               | Pa   |                                     |                          |
| 9  | Poisson's Ratio                                   | 0.3                 |      |                                     |                          |
| 10 | Bulk Modulus                                      | 1.6667E+11          | Pa   |                                     |                          |
| 11 | Shear Modulus                                     | 7.6923E+10          | Pa   |                                     |                          |
| 12 | Orthotropic Elasticity                            |                     |      | <input type="checkbox"/>            |                          |
| 13 | Young's Modulus X direction                       | 7.856E+10           | Pa   |                                     |                          |
| 14 | Young's Modulus Y direction                       | 7.856E+10           | Pa   |                                     |                          |
| 15 | Young's Modulus Z direction                       | 6.2498E+10          | Pa   |                                     |                          |
| 16 | Poisson's Ratio XY                                | 0.28798             |      |                                     |                          |
| 17 | Poisson's Ratio YZ                                | 0.45204             |      |                                     |                          |
| 18 | Poisson's Ratio XZ                                | 0.45204             |      |                                     |                          |
| 19 | Shear Modulus XY                                  | 3E+10               | Pa   |                                     |                          |
| 20 | Shear Modulus YZ                                  | 2.6E+10             | Pa   |                                     |                          |
| 21 | Shear Modulus XZ                                  | 2.6E+10             | Pa   |                                     |                          |
| 22 | Strain-Life Parameters                            |                     |      | <input type="checkbox"/>            |                          |
| 30 | S-N Curve                                         | Tabular             |      |                                     | <input type="checkbox"/> |
| 34 | Tensile Yield Strength                            | 2.5E+08             | Pa   |                                     |                          |
| 35 | Compressive Yield Strength                        | 2.5E+08             | Pa   |                                     |                          |
| 36 | Tensile Ultimate Strength                         | 4.6E+08             | Pa   |                                     |                          |
| 37 | Compressive Ultimate Strength                     | 0                   | Pa   |                                     |                          |

Fig. S3. Piezoelectric material properties

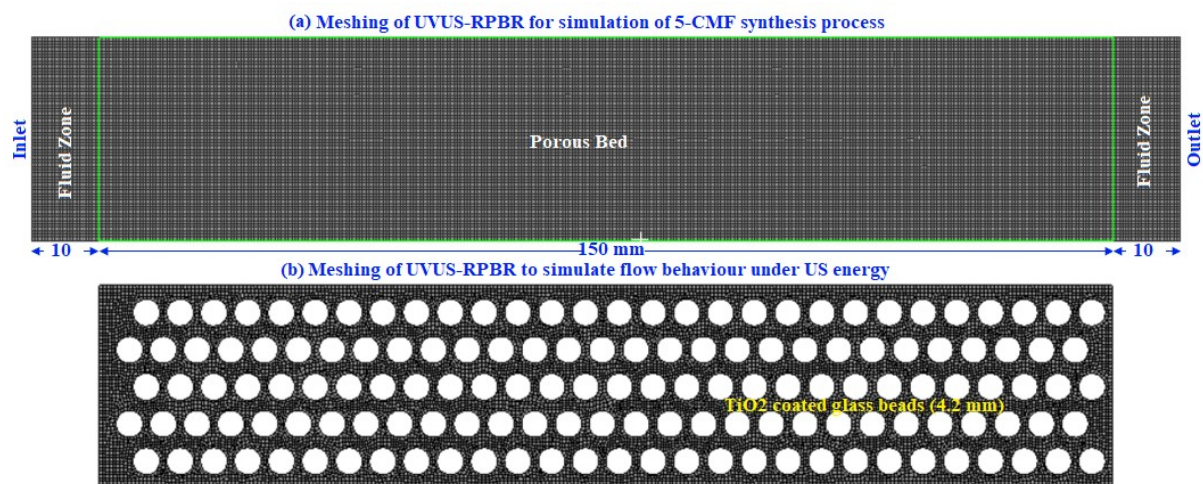

Fig. S4. Meshing of UVUS-RPBR for the simulation study

Table S5. Operational parameter for transient simulation

| Parameters                                       | Values |
|--------------------------------------------------|--------|
| Temperature (K)                                  | 353    |
| Pressure (Pa)                                    | 101325 |
| Superficial aqueous liquid feed velocity (m/s)   | 4.1E-5 |
| Reactor width (m)                                | 0.05   |
| Reactor height (m)                               | 0.03   |
| Reactor length (m)                               | 0.15   |
| Bed porosity                                     | 0.56   |
| TiO <sub>2</sub> coated glass beads diameter (m) | 0.0042 |
| Mesh size (m)                                    | 0.0005 |
| Step size                                        | 0.1    |
| Time steps                                       | 36000  |

## References

1. X. Gao, R. Kumar and S. Singh, *Biotechnology for Biofuels*, 2014, **7**, 1-13.
2. H.S. Fogler, *Essentials of Chemical Reaction Engineering*, Essenti Chemica Reactio Engi, Pearson Education, 2010.
3. E. L. Cussler, *Diffusion: mass transfer in fluid systems*. Cambridge university press, 2009.
4. V. Frenkel, R. Gurka, A. Liberzon, U. Shavit and E. Kimmel, *Ultrasonics*, 2001, **39**, 153-156.
5. W. Hayduk and H. Laudie, *AIChE Journal*, 1974, **20**, 611-5.
